# Supplementary material for: Impact of Dairy Products and Plant-Based Alternatives on Dental Health: Food Matrix Effects
Source: MDPI journal article supplement (doi:10.3390/nu15061469), 2023-03-18
Supplement: s1 [file s1]

**Table S1.** Nutritional composition of plant-based drinks and bovine milk.

| Type                              | Products name             | Carbohydrate (g/100g) | Sugars (g/100g) | Sugar added                                            | Glucose  | Fructose | Sucrose  | Maltose  | Lactose      | Calcium (mg/100g) | Phosphorus (mg/100g) | Protein (g/100g) | Fat (g/100g) | References |
|-----------------------------------|---------------------------|-----------------------|-----------------|--------------------------------------------------------|----------|----------|----------|----------|--------------|-------------------|----------------------|------------------|--------------|------------|
|                                   |                           |                       |                 |                                                        | (g/100g) | (g/100g) | (g/100g) | (g/100g) | (g/100g)     |                   |                      |                  |              |            |
| Bovine milk                       | Pura Milk Fresh           | 4.9 g/100 ml          | 4.9 g/100 ml    | DNS                                                    |          |          |          |          |              | 103.9 mg/100 ml   | 64.6 mg/100 ml       | 3.2 g/100 ml     | 3.4 g/100 ml |            |
| Bovine milk                       | Pura Milk Long Life (UHT) | 4.9 g/100 ml          | 4.9 g/100 ml    | DNS                                                    |          |          |          |          |              | 111.7 mg/100 ml   | 66.6 mg/100 ml       | 3.2 g/100 ml     | 3.4 g/100 ml |            |
| Soy drink                         | So Good Lite              | 4.7 g/100 ml          | 1.9 g/100 ml    | Corn maltodextrin, cane sugar                          | DNS      | DNS      | DNS      | DNS      | DNS          | 116.6 mg/100 ml   | 106.6 mg/100 ml      | 3.4 g/100 ml     | 0.9 g/100 ml | [31]       |
| Soy drink                         | So Good Regular           | 5.0 g/100 ml          | 2.0 g/100 ml    | Corn maltodextrin, cane sugar                          |          |          |          |          |              | 119.7 mg/100 ml   | 89.6 mg/100 ml       | 3.4 g/100 ml     | 3.4 g/100 ml |            |
| Soy drink                         | So Good Essential         | 6.3 g/100 ml          | 2.2 g/100 ml    | Corn/wheat maltodextrin, cane sugar, corn syrup solids |          |          |          |          |              | 131.2 mg/100 ml   | 102.2 mg/100 ml      | 3.2 g/100 ml     | 1.5 g/100 ml |            |
| Soy drink                         | Vitasoy Original          | 6.1 g/100 ml          | 3.5 g/100 ml    | DNS                                                    |          |          |          |          |              | 127.9 mg/100 ml   | 76.6 mg/100 ml       | 3.3 g/100 ml     | 3.0 g/100 ml |            |
| Follow-on formula—High casein     | Bear 2                    |                       |                 | Lactose                                                | DNS      |          | DNS      |          | 20.52        |                   |                      |                  |              |            |
| Follow-on formula—Low casein      | Snow F Plus Beta          |                       |                 | Lactose                                                | DNS      |          | DNS      |          | 2.6          |                   |                      |                  |              |            |
| Follow-on formula—High casein     | Meiji FU                  | DNS                   | DNS             | Isomaltoligosaccharide, glucose, lactose               | 6.8      | DNS      | DNS      | DNS      | 26.5         | DNS               | DNS                  | DNS              | DNS          | [99]       |
| Follow-on formula—Low casein      | Gain Advance              |                       |                 | Sucrose, lactose                                       | DNS      |          | 1.61     |          | 1.98         |                   |                      |                  |              |            |
| Whole milk                        | Dumex 1 Plus              |                       |                 | Lactose                                                | DNS      |          | DNS      |          | 5.01         |                   |                      |                  |              |            |
| Whole milk                        | Honey Bear                |                       |                 | Lactose, sucrose, maltodextrin, honey, oligo-fructose  | DNS      |          | 10       |          | 2            |                   |                      |                  |              |            |
| Whole milk                        | Dumex Dumilk              |                       |                 | Sucrose                                                | DNS      |          | 18       |          | DNS          |                   |                      |                  |              |            |
| Soy-based formula                 | Isomil                    |                       |                 | Sucrose, glucose, syrup                                | DNS      |          | 10.4     |          | DNS          |                   |                      |                  |              |            |
| Protein hydrolysate-based formula | Pregestimil               |                       |                 | Glucose, syrup, maltodextrin                           | DNS      |          | DNS      |          | DNS          |                   |                      |                  |              |            |
| Bovine milk                       | Woolworths Australian     | 4.8 g/100 ml          | 4.8 g/100 ml    |                                                        |          |          |          |          | 4.8 g/100 ml | 117 mg/100 ml     |                      | 3.3 g/100 ml     | 3.4 g/100 ml |            |

| Soy drink       | Full Cream Milk                              | 3.1 g/100 ml | 2.1 g/100 ml | DNS                   | DNS  | DNS   | DNS   | DNS  | DNS  | 120 mg/100 ml | DNS  | 3.0 g/100 ml | 3.0 g/100 ml | [76] |
|-----------------|----------------------------------------------|--------------|--------------|-----------------------|------|-------|-------|------|------|---------------|------|--------------|--------------|------|
|                 | Vitasoy® Milky Regular                       |              |              |                       |      |       |       |      |      |               |      |              |              |      |
| Almond drink    | Almond MLK                                   |              | 0.58         |                       | 0.06 | nd    | 0.52  | nd   |      |               |      | 2.11         | 4.40         |      |
| Almond drink    | Almond original                              |              | 3.69         |                       | 0.22 | 0.06  | 3.42  | nd   |      |               |      | 0.41         | 1.18         |      |
| Almond drink    | Organic almond drink                         |              | 0.16         |                       | nd   | nd    | 0.16  | nd   |      |               |      | 0.95         | 3.69         |      |
| Almond drink    | Carob almond MLK                             |              | 4.58         |                       | 0.87 | 0.61  | 3.10  | nd   |      |               |      | 2.4          | 3.35         |      |
| Cashew drink    | Organic cashew drink                         |              | 2.87         |                       | 0.49 | 1.96  | 0.43  | nd   |      |               |      | 0.87         | 2.50         |      |
| Coconut drink   | Coconut original                             |              | 1.86         |                       | 0.81 | nd    | nd    | 1.05 |      |               |      | 0.08         | 0.84         |      |
| Hazelnut drink  | Hazelnut original                            | DNS          | 3.09         | DNS                   | nd   | nd    | 3.09  | nd   | DNS  | DNS           | DNS  | 0.36         | 1.56         | [74] |
| Hemp drink      | Hemp milk unsweetened                        |              | 0.09         |                       | 0.02 | 0.01  | 0.05  | nd   |      |               |      | 0.08         | 2.44         |      |
| Macadamia drink | Organic macadamia drink                      |              | 2.79         |                       | 0.30 | 2.23  | 0.26  | nd   |      |               |      | 0.29         | 2.62         |      |
| Oat drink       | Organic oat drink                            |              | 3.35         |                       | 0.01 | nd    | nd    | 3.34 |      |               |      | 0.70         | 0.38         |      |
| Quinoa drink    | Quinoa drink                                 |              | 3.2          |                       | 0.43 | 2.34  | nd    | 0.43 |      |               |      | 0.22         | 2.32         |      |
| Rice drink      | Organic rice drink natural                   |              | 7.02         |                       | 4.12 | 0.07  | nd    | 2.83 |      |               |      | 0.32         | 0.85         |      |
| Rice drink      | Organic brown rice drink                     |              | 5.58         |                       | 3.07 | 0.10  | nd    | 2.41 |      |               |      | 0.07         | 0.95         |      |
| Soy drink       | Organic soya drink, calcium                  |              | 2.43         |                       | 0.50 | 1.27  | nd    | 0.66 |      |               |      | 2.72         | 2.11         |      |
| Soy drink       | Plain UHT organic soya drink                 |              | 0.88         |                       | 0.52 | nd    | 0.36  | nd   |      |               |      | 3.70         | 2.04         |      |
| Soy drink       | Soya organic, wholebean                      |              | 0.36         |                       | 0.01 | nd    | 0.35  | nd   |      |               |      | 3.16         | 1.77         |      |
| Soy drink       | Soya original                                |              | 3.09         |                       | 0.15 | 0.06  | 2.88  | nd   |      |               |      | 2.61         | 1.48         |      |
| Bovine milk     | Bovine fresh milk, pasteurised & homogenised |              | 3.38         |                       | nd   | nd    | nd    | nd   |      |               |      | 3.70         | 3.28         |      |
| Almond drink    |                                              | 1.3          |              |                       | 0.01 | 0.001 | 1.25  |      | DNS  | 65.6          | 43.4 | 1.02         | 2.56         |      |
| Cashew drink    |                                              | 2.28         |              |                       | 0.03 | 0.0   | 0.36  |      | DNS  | 6.4           | 33.7 | 1.33         | 2.76         |      |
| Coconut drink   |                                              | 2.77         |              |                       | 0.31 | 0.0   | 1.6   |      | DNS  | 47.1          | 29.6 | 0.32         | 1.02         |      |
| Bovine milk     |                                              | 5.03         | DNS          | DNS                   | 0.01 | 0.0   | 0.0   | DNS  | 5.02 | 112.1         | 92.4 | 3.26         | 3.54         | [2]  |
| Hemp drink      |                                              | 1.6          |              |                       | 0.03 | 0.0   | 0.135 |      | DNS  | 4.5           | 26.6 | 0.72         | 3.26         |      |
| Oat drink       |                                              | 3.67         |              |                       | 3.32 | 0.09  | 0.15  |      | DNS  | 49.9          | 28.9 | 0.46         | 1.45         |      |
| Rice drink      |                                              | 4.82         |              |                       | 2.46 | 0.08  | 0.23  |      | DNS  | 54.4          | 7.1  | 0.17         | 1.26         |      |
| Soy drink       |                                              | 1.47         |              |                       | 0.01 | 0.001 | 1.4   |      | DNS  | 84.2          | 80.7 | 3.78         | 2.06         |      |
| Spelt drink     |                                              | 4.95         |              |                       | 3.72 | 0.11  | 0.07  |      | DNS  | 12.1          | 31   | 0.72         | 1.22         |      |
| Soy drink       |                                              | 2.5          |              | 2.1 g/100g free sugar |      |       |       |      | 0    |               |      | 3.2          | 2.0          |      |
| Oat drink       |                                              | 7.5          |              | 4.4 g/100g free sugar |      |       |       |      | 0    |               |      | 0.8          | 1.3          |      |
| Almond drink    |                                              | 3.4          | DNS          | 2.7 g/100g free sugar | DNS  | DNS   | DNS   | DNS  | 0    | DNS           | DNS  | 0.6          | 2.2          | [3]  |
| Coconut drink   |                                              | 2.6          |              | 1.5 g/100g free sugar |      |       |       |      | 0    |               |      | 0.1          | 1.5          |      |

|                           |                                               |               |                          |              |       |       |       |       |       |               |               |               |               |
|---------------------------|-----------------------------------------------|---------------|--------------------------|--------------|-------|-------|-------|-------|-------|---------------|---------------|---------------|---------------|
| Rice drink                | 10.3                                          |               | 5.7 g/100g<br>free sugar |              |       |       |       |       | 0     |               | 0.2           | 0.9           |               |
| Semi-skimmed, bovine milk | 4.8                                           |               | 0 g/100g<br>free sugar   |              |       |       |       |       | 4.7   |               | 3.3           | 1.6           |               |
| Almond drink              |                                               | <0.5          |                          | <0.1         | <0.1  | 0.1   | <0.1  | <0.1  | 133   | 73            | 0.73          | 1.6           |               |
| Almond drink              | DNS                                           | <0.5          | DNS                      | <0.1         | <0.1  | 0.1   | <0.1  | <0.1  | 112   | 59            | 0.92          | 1.7           |               |
| Almond drink              |                                               | <0.5          |                          | <0.1         | <0.1  | 0.1   | <0.1  | <0.1  | 26    | 13.5          | 0.7           | 1.5           |               |
| Soy drink                 |                                               | 1.7           |                          | <0.1         | <0.1  | 1.6   | 0.1   | <0.1  | 153   | 122           | 2.91          | 2.8           |               |
| Soy drink                 | DNS                                           | 2.1           | DNS                      | <0.1         | <0.1  | 2.1   | <0.1  | <0.1  | 17.3  | 39            | 2.8           | 2.6           |               |
| Soy drink                 |                                               | 1.6           |                          | <0.1         | <0.1  | 1.5   | 0.1   | <0.1  | 129   | 110           | 2.91          | 2.7           |               |
| Coconut drink             |                                               | 2.1           |                          | <0.1         | <0.1  | 2.1   | <0.1  | <0.1  | 125   | 61            | 0.44          | 2.3           |               |
| Coconut drink             | DNS                                           | <0.5          | DNS                      | <0.1         | <0.1  | 0.2   | <0.1  | <0.1  | 131   | 65            | 0.48          | 2.6           |               |
| Coconut drink             |                                               | 3.1           |                          | <0.1         | 0.5   | 2.6   | <0.1  | <0.1  | 84    | 115           | 1.75          | 1.4           |               |
| Coconut drink             |                                               | 0.3           |                          | DNS          | DNS   | DNS   | DNS   | 0     | 75    | 46            | 0.2           | 2.1           |               |
| Oat drink                 |                                               | 1.8           |                          | 0.2          | <0.1  | <0.1  | 1.6   | <0.1  | 85    | 103           | 0.76          | 3             |               |
| Oat drink                 | DNS                                           | 1.1           | DNS                      | 0.3          | <0.1  | 0.1   | 0.7   | <0.1  | 132   | 118           | 0.67          | 2             |               |
| Oat drink                 |                                               | 3.1           |                          | <0.1         | <0.1  | 0.1   | 3     | <0.1  | 65    | 32            | 1.11          | 1.3           |               |
| Oat drink                 |                                               | 5.7           |                          | 4.4          | <0.1  | 0.1   | 0.9   | 0.2   | 3.7   | 12.1          | 0.64          | 1.3           |               |
| Rice drink                |                                               | 5.3           |                          | 4.3          | <0.1  | 0.1   | 0.9   | <0.1  | 90    | 55            | 0.4           | 1.2           |               |
| Rice drink                | DNS                                           | 4.1           | DNS                      | 0.3          | <0.1  | <0.1  | 3.8   | <0.1  | 141   | 14.5          | 0.47          | 0.9           |               |
| Rice drink                |                                               | 4.3           |                          | 0.3          | <0.1  | <0.1  | 4     | <0.1  | 114   | 56            | 0.32          | 0.9           |               |
| Chilled milk              |                                               | 4.2           |                          | <0.1         | <0.1  | <0.1  | <0.1  | 4.2   | 107   | 85            | 3.19          | 3.4           |               |
| Chilled milk              | DNS                                           | 4.3           | DNS                      | <0.1         | <0.1  | <0.1  | <0.1  | 4.3   | 123   | 93            | 3.7           | 3.2           |               |
| Chilled milk              |                                               | 4.3           |                          | <0.1         | <0.1  | <0.1  | <0.1  | 4.3   | 110   | 87            | 3.13          | 3.3           |               |
| UHT milk                  |                                               | 4             |                          | <0.1         | <0.1  | <0.1  | <0.1  | 4     | 116   | 94            | 3.45          | 3.4           |               |
| UHT milk                  | DNS                                           | 4.2           | DNS                      | <0.1         | <0.1  | <0.1  | <0.1  | 4.2   | 123   | 100           | 3.76          | 3.3           |               |
| UHT milk                  |                                               | 4.1           |                          | <0.1         | <0.1  | <0.1  | <0.1  | 4.1   | 114   | 92            | 3.64          | 3.2           |               |
| Bovine milk               | Milk, whole, 3.25% milkfat                    | 4.78          | 5.05                     | DNS          | 0     | 0     | 0     | 0     | 5.05  | 113           | 84            | 3.15          | 3.27          |
| Soy drink                 | Natural soy bean milk                         | 2.63 g/100 ml | 1.58 g/100 ml            | DNS          | DNS   | DNS   | DNS   | DNS   | DNS   | 0 mg/100 ml   | DNS           | 3.16 g/100 ml | 3.68 g/100 ml |
| Soy drink                 | Original soy milk, original                   | 3.75 g/100 ml | 2.5 g/100 ml             | DNS          | DNS   | DNS   | DNS   | DNS   | DNS   | 188 mg/100 ml | 104 mg/100 ml | 3.33 g/100 ml | 1.88 g/100 ml |
| Soy drink                 | Organic edensoy original soy milk             | 5.83 g/100 ml | 2.92 g/100 ml            | DNS          | DNS   | DNS   | DNS   | DNS   | DNS   | 42 mg/100 ml  | 62 mg/100 ml  | 4.58 g/100 ml | 2.08 g/100 ml |
| Soy drink                 | Soy milk, unsweetened, plain, refrigerated    | 3             | DNS                      | DNS          | <0.25 | <0.25 | 2.58  | <0.25 | <0.25 | 155           | 46            | 2.78          | 1.96          |
| Soy drink                 | Soy milk, unsweetened, plain, shelf stable    | 1.29          | 0.56                     | DNS          | <0.25 | <0.25 | 0.56  | <0.25 | <0.25 | 101           | 69            | 3.55          | 2.12          |
| Almond drink              | Almond milk, unsweetened, plain, refrigerated | 0.67          | DNS                      | DNS          | <0.25 | <0.25 | 0.04  | <0.25 | <0.25 | 158           | 19            | 0.66          | 1.56          |
| Almond drink              | Almond milk, unsweetened, plain, shelf stable | 0.34          | 0                        | DNS          | <0.25 | <0.25 | <0.25 | <0.25 | <0.25 | 173           | 30            | 0.55          | 1.22          |
| Almond drink              | Milked almonds                                | 3.75 g/100 ml | 2.92 g/100 ml            | 2.5 g/100 ml | DNS   | DNS   | DNS   | DNS   | DNS   | 3 mg/100 ml   | DNS           | 2.08 g/100 ml | 4.58 g/100 ml |

[1]

[1]

|                     |                                                                            |               |               |              |      |       |       |      |       |               |               |               |               |       |
|---------------------|----------------------------------------------------------------------------|---------------|---------------|--------------|------|-------|-------|------|-------|---------------|---------------|---------------|---------------|-------|
| Almond drink        | Original almond milk, original                                             | 3.33 g/100 ml | 2.92 g/100 ml | DNS          | DNS  | DNS   | DNS   | DNS  | DNS   | 42 mg/100 ml  | DNS           | 0.42 g/100 ml | 1.04 g/100 ml | [104] |
| Almond drink        | Almond milk original                                                       | 0.89          | 0             | DNS          | DNS  | DNS   | DNS   | DNS  | DNS   | 0             | DNS           | 0.45          | 1.56          |       |
| Oat drink           | Milked oats                                                                | 7.5 g/100 ml  | 2.08 g/100 ml | 1.7 g/100 ml | DNS  | DNS   | DNS   | DNS  | DNS   | 8 mg/100 ml   | DNS           | 1.67 g/100 ml | 0.62 g/100 ml |       |
| Oat drink           | The original oat-milk                                                      | 6.67 g/100 ml | 2.92 g/100 ml | DNS          | DNS  | DNS   | DNS   | DNS  | DNS   | 146 mg/100 ml | 112 mg/100 ml | 1.25 g/100 ml | 2.08 g/100 ml |       |
| Oat drink           | Original milked oats, original                                             | 7.32 g/100 ml | 1.97 g/100 ml | 1.4 g/100 ml | DNS  | DNS   | DNS   | DNS  | DNS   | 8 mg/100 ml   | DNS           | 1.13 g/100 ml | 0.7 g/100 ml  |       |
| Oat drink           | Original milked oats, original                                             | 7.38 g/100 ml | 1.85 g/100 ml | 1.5 g/100 ml | DNS  | DNS   | DNS   | DNS  | DNS   | 8 mg/100 ml   | DNS           | 1.23 g/100 ml | 0.77 g/100 ml |       |
| Oat drink           | Organic barista oat milk                                                   | 9.3 g/100 ml  | 4.65 g/100 ml | DNS          | DNS  | DNS   | DNS   | DNS  | DNS   | 0 mg/100 ml   | DNS           | 0.42 g/100 ml | 2.11 g/100 ml |       |
| Oat drink           | The original oat-milk, original                                            | 6.67 g/100 ml | 3.03 g/100 ml | DNS          | DNS  | DNS   | DNS   | DNS  | DNS   | 106 mg/100 ml | 91 mg/100 ml  | 1.21 g/100 ml | 2.12 g/100 ml |       |
| Oat drink           | Original organic oat milk, original                                        | 7.08 g/100 ml | 2.5 g/100 ml  | 2.5 g/100 ml | DNS  | DNS   | DNS   | DNS  | DNS   | 4 mg/100 ml   | DNS           | 1.25 g/100 ml | 0.62 g/100 ml |       |
| Oat drink           | Original plant-based oat milk, original                                    | 8.75 g/100 ml | 5.42 g/100 ml | DNS          | DNS  | DNS   | DNS   | DNS  | DNS   | 121 mg/100 ml | DNS           | 0.83 g/100 ml | 1.67 g/100 ml |       |
| Oat drink           | Unsweetened milked oats, unsweetened                                       | 5.83 g/100 ml | 0.42 g/100 ml | DNS          | DNS  | DNS   | DNS   | DNS  | DNS   | 8 mg/100 ml   | DNS           | 1.67 g/100 ml | 0.62 g/100 ml |       |
| Oat drink           | Oat milk, unsweetened, plain, refrigerated                                 | 5.1           | 2.32          | DNS          | 0.77 | <0.25 | <0.25 | 1.55 | <0.25 | 148           | 89            | 0.8           | 2.75          |       |
| Nut & oat drink     | Organic nut & oat milks blend                                              | 2.95 g/100 ml | 0.84 g/100 ml | DNS          | DNS  | DNS   | DNS   | DNS  | DNS   | 8 mg/100 ml   | DNS           | 1.69 g/100 ml | 3.38 g/100 ml |       |
| Nut & oat drink     | Organic nut & oat milks blend                                              | 3.38 g/100 ml | 1.27 g/100 ml | DNS          | DNS  | DNS   | DNS   | DNS  | DNS   | 17 mg/100 ml  | DNS           | 1.69 g/100 ml | 4.64 g/100 ml |       |
| Rice drink          | Rice drink, original                                                       | 9.58 g/100 ml | 4.17 g/100 ml | DNS          | DNS  | DNS   | DNS   | DNS  | DNS   | 125 mg/100 ml | 62 mg/100 ml  | 0.42 g/100 ml | 1.04 g/100 ml |       |
| Rice drink          | Original organic non-dairy beverage rice drink, original                   | 9.17 g/100 ml | 2.5 g/100 ml  | DNS          | DNS  | DNS   | DNS   | DNS  | DNS   | 146 mg/100 ml | DNS           | 0.42 g/100 ml | 1.04 g/100 ml |       |
| Rice drink          | Organic sprouted rice drink, original                                      | 9.58 g/100 ml | 4.17 g/100 ml | DNS          | DNS  | DNS   | DNS   | DNS  | DNS   | 125 mg/100 ml | 62 mg/100 ml  | 0.42 g/100 ml | 1.04 g/100 ml |       |
| Rice & quinoa drink | Dream blends, unsweetened enriched rice & quinoa drink, original, original | 3.75 g/100 ml | 0.42 g/100 ml | DNS          | DNS  | DNS   | DNS   | DNS  | DNS   | 125 mg/100 ml | DNS           | 0.42 g/100 ml | 1.04 g/100 ml |       |
| Almond drink*       | Silk Original Almond                                                       |               | 2.92 g/100 ml | cane sugar   |      |       |       |      |       |               |               | 0.42 g/100 ml |               |       |
| Almond drink*       | Silk Original Unsweetened Almond                                           |               | 0 g/100 ml    | none         |      |       |       |      |       |               |               | 0.42 g/100 ml |               |       |

|               |                                           |     |               |                       |     |     |     |     |     |     |     |               |     |      |
|---------------|-------------------------------------------|-----|---------------|-----------------------|-----|-----|-----|-----|-----|-----|-----|---------------|-----|------|
| Almond drink* | Silk Vanilla Almond                       |     | 6.67 g/100 ml | cane sugar            |     |     |     |     |     |     |     | 0.42 g/100 ml |     |      |
| Almond drink* | Silk Chocolate Almond                     | DNS | 7.08 g/100 ml | cane sugar cocoa      | DNS | 0.42 g/100 ml | DNS | [75] |
| Almond drink* | Almond Breeze Original Almond             |     | 2.92 g/100 ml | evaporated cane juice |     |     |     |     |     |     |     | 0.42 g/100 ml |     |      |
| Almond drink* | Almond Breeze Original Unsweetened Almond |     | 0 g/100 ml    | none                  |     |     |     |     |     |     |     | 0.42 g/100 ml |     |      |
| Bovine milk*  | Horizon Whole Milk                        |     | 4.58 g/100 ml | none                  |     |     |     |     |     |     |     | 3.33 g/100 ml |     |      |
| Soy drink*    | Silk Soy Milk                             |     | 2.5 g/100 ml  | none                  |     |     |     |     |     |     |     | 3.33 g/100 ml |     |      |

\*Values for products calculated assuming a serving size of 240 mL; DNS: refers to data non supplied; nd: refers to not detectable.

**Table S2.** Fluoride concentration of plant based drinks and bovine milk.

| Type        | Products Name             | Fluoride ( $\mu\text{g/mL}$ or ppm) | References |
|-------------|---------------------------|-------------------------------------|------------|
| Bovine milk | Pura Milk Fresh           | 0.35                                |            |
| Bovine milk | Pura Milk Long Life (UHT) | 1.08                                |            |
| Soy drink   | So Good Lite              | 0.67                                | [31]       |
| Soy drink   | So Good Regular           | 1.31                                |            |
| Soy drink   | So Good Essential         | 0.51                                |            |
| Soy drink   | Vitasoy Original          | 0.44                                |            |
| Soy drink   | Asda                      | 0.065                               |            |
| Soy drink   | Alpro                     | 0.603                               |            |
| Soy drink   | Calsoy                    | 0.015                               |            |
| Soy drink   | Cooperative               | 0.250                               |            |
| Soy drink   | Holland and Barrett       | 0.231                               |            |
| Soy drink   | Marks and Spencer         | 0.261                               | [23]       |
| Soy drink   | Morrison                  | 0.322                               |            |
| Soy drink   | Provamel                  | 0.327                               |            |
| Soy drink   | Sainsbury                 | 0.274                               |            |
| Soy drink   | Soya Soleil               | 0.066                               |            |
| Soy drink   | Tesco                     | 0.279                               |            |
| Soy drink   | Vitasoy                   | 0.376                               |            |
| Soy drink   | Vivesoy                   | 0.391                               |            |
| Soy drink   | Waitrose                  | 0.224                               |            |
| Soy drink   | Yeo                       | 0.381                               |            |
